# Supplementary material for: Hydrogel tapes for fault-tolerant strong wet adhesion
Source: Research Square preprint supplement (doi:10.21203/rs.3.rs-602221/v1), 2021-06-21
Supplement: Supplementary file 1 [file c3cbede070e67ebb5b015f8d.docx]

**Supplementary Materials for**

**Hydrogel tapes for fault-tolerant strong wet adhesion**

Bin Xue†, 1, Jie Gu†, 1, Wenting Yu1, Lan Li2, Meng Qin1, Qin Jiang2, Wei Wang1, 3, * and Yi Cao1, 3, 4, 5, *

*1 Collaborative Innovation Center of Advanced Microstructures, National Laboratory of Solid State Microstructure, Key Laboratory of Intelligent Optical Sensing and Manipulation, Ministry of Education, Department of Physics, Nanjing University, Nanjing 210093, China*

*2 State Key Laboratory of Pharmaceutical Biotechnology, Department of Sports Medicine and Adult Reconstructive Surgery, Drum Tower Hospital affiliated to Medical School of Nanjing University, Nanjing, 210008, China.*

*3 Institute for Brain Sciences, Nanjing University, Nanjing, 210093, China.*

*4 Chemistry and Biomedicine innovation center, Nanjing University, Nanjing, 210093, China.*

*5 Wenzhou Institute, University of Chinese Academy of Sciences, Wenzhou 325001, China*

*Correspondence to: caoyi@nju.edu.cn or wangwei@nju.edu.cn

† These authors contributed equally to this work.

**This file includes:**

Supplementary Materials and Methods

Fig. S1 to S12

Captions for Movie S1 to S6

**Other Supplementary Information for this manuscript include the following:**

Movie S1 to S6

**Supplementary Materials and Methods**

**Materials**

N-Hydroxy succinimide (NHS), 1-(3-dimethylaminopropyl)-3-ethylcarbodiimide hydrochloride (EDC), dihydroxyphenylalanine (dopa) and bovine serum albumin (BSA) were purchased from Shanghai Aladdin Biochemical Technology Co., Ltd. Acrylic acid was purchased from Aladdin Industrial Corporation (Shanghai, China), and sodium alginate (10 kDa) was purchased from Beijing J&K Scientific Co., Ltd. All other chemical reagents, unless otherwise stated, were purchased from Shanghai Aladdin Biochemical Technology Co., Ltd. (China). ddH2O was produced by a Milli-Q® integral water purification system (Merck KGaA, Germany). The cell line and associated culture reagents included the following: the calcein-AM and propidium iodide (PI) double staining kit (cat: KGAF001, Keygen, China), the cell culture medium AMEM and DMEM (cat: 310-010-CL and cat: 319-051-CL, Wisent, China), the culture supplement foetal bovine serum (FBS) (cat: 10091148, Gibco, USA), MC 3T3 and MEF cells (Stem Cell Bank, Chinese Academy of Sciences, China). All reagents were used without further purification.

**Synthesis of polyacrylic acid (PAA)**

Acrylic acid and ammonium persulfate (APS) were dissolved into ddH2O to the concentration of 300 and 1 mg mL-1, respectively. Then the polymerization was achieved under the UV irradiation for 1 hour. The product was dialyzed in ddH2O to remove the unreacted reagents and concentrated.

**Synthesis of alginate-dopa**

Alginate-dopa was prepared by connecting dopa to the carboxyl group of alginate (10 kDa) in the presence of NHS and EDC. Typically, alginate and dopa were dissolved in ddH2O to concentrations of 0.1 M, respectively. Then, EDC and NHS were added to the solution to a concentration of 0.6 M. The mixture was stirred for 12 h at room temperature. Finally, the unreacted reactants were removed by dialysis in ddH2O, and the product was lyophilized. The linking efficiency of alginate-dopa was confirmed with UV calibration curves (Fig. S1).

**Oxidization of N-acetyldopamine and alginate-dopa**

The electro-oxidation of N-acetyldopamine or alginate-dopa was completed by a galvanic cell, as shown in Fig. S2. In a typical electro-oxidation process, N-acetyldopamine (100 mM) or alginate-dopa (20 mg mL-1) dissolved in phosphate buffer solution (PBS) (10 mM, pH=7.4) was placed at the anode. PBS (10 mM, pH=7.4) was used as the electrolyte at the cathode. The salt bridge was made of 33 w/v % agar gel containing KCl (3 M). Then, an electric potential of 5 V was applied to the system for different times (2, 4, 6, 8 and 24 h). All experiments were undertaken at room temperature.

**High-performance liquid chromatography (HPLC)**

The electro-oxidized and chemically oxidized products of N-acetyldopamine were analysed with high-performance liquid spectroscopy (HPLC) and mass spectrometry. HPLC analysis was performed on a ThermoScientific U3000 system at 280 nm with a GE SOURCETM 5RPC ST 4.6/150 column. The mobile phases were as follows: solvent A: 0.1% TFA in H2O and solvent B: 0.1% TFA in CH3CN. The gradient program was as follows: 0 to 20 min, 95% A to 5% A; 20 to 22 min, 5% A; 22 to 25 min, 5% to 95% A; 25 to 26 min, 95% A. All the samples were dissolved in ddH2O.

**Swelling ratio and solid content measurements**

For the swelling experiments, the volume of the hydrogel after the gelation using EDC/NHS was recorded as V1. Then, the hydrogel was immersed in 50 times PBS solutions (10 mM, pH=7.5) for 24 hours at room temperature to reach swelling equilibrium, and the volume was recorded as V2. The swelling ratio (Ɛ) was calculated by the equation Ɛ =V2/V1.

For the solid content measurements, the hydrogel samples stored in the mixture of alcohol (75%) and ddH2O (25%) were weighed, and the wet weight was recorded as W1. Then, the hydrogel samples were dried, and the weight was recorded again as W2. The solid content (*ʂ*) was calculated as *ʂ =W2/W1 ×100%*.

**Scanning electron microscopy (SEM) images**

Scanning electron microscopy (SEM) images were obtained using a Quanta scanning electron microscope (Quata 200, FEI) at 20 kV. The hydrogels were dialysed in ddH2O water for 24 h to remove the unbound salts and lyophilized material prior to measurement. Then, the samples were sputter-coated with platinum and imaged with SEM.

**In vitro biocompatibility**

Mouse embryo osteoblast precursor (MC3T3) cells were cultivated in AMEM and mouse embryonic fibroblast (MEF) cells were cultivated in DMEM. 10% foetal bovine serum and 1% penicillin & streptomycin were added to the medium. All the cells used in cell viability testing were before 5 passages.

To assess the cell viability of cells living on gel, 100 µL gel was prepared in each well of opaque-walled multiwall plates before collecting cells, and cells were digested from culture dishes. Then, the cells were seeded into the wells containing hydrogel at a density of 6000 per well. Pristine DMEM was used as control. Cell incubation was performed at 37 °C and 5% CO2. After 24 hours, the plates were equilibrated to room temperature for approximately half an hour. Then, a live/dead viability/cytotoxicity kit (Calcein-AM/PI Double Staining Kit) was used to evaluate cell viability. After washing the wells twice with PBS solution, calcein AM and propidium iodide (PI) dye solution were mixed and added to each well. Then, the plate was incubated at 37 °C for 30 min before being washed with PBS (10 mM, pH=7.4) 3 times. Finally, images were obtained using an OLYMPUS-IX73 fluorescence microscope (OLYMPUS, USA).

**Figures**


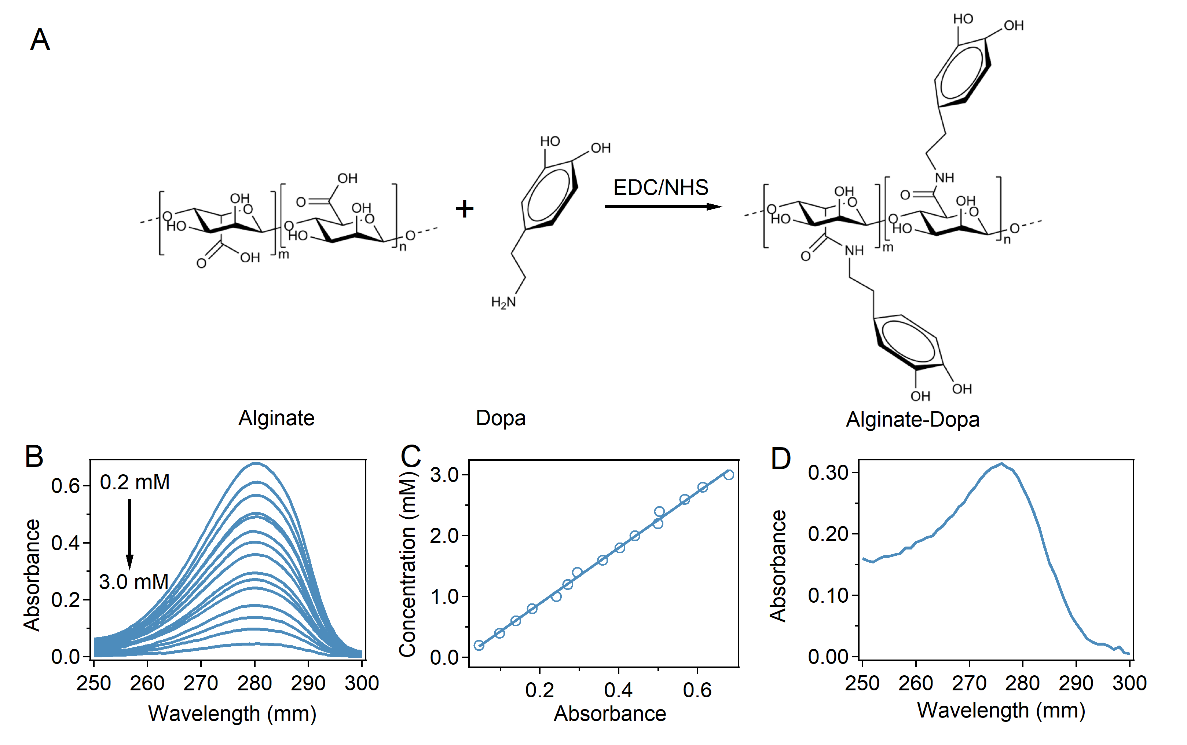


**Fig. S1** Determination of the conjunction efficiency of Dopa and alginate. **a**, Chemical structure of alginate and alginate-dopa. **b**, UV-vis spectra of Dopa at various concentrations (0.2-3.0 mM). **c**, Calibration curve of OD320 nm and Dopa concentrations. **d**, UV absorbance of the alginate-Dopa at the concentration of 1 mg mL-1. The mass percentage of Dopa in alginate-dopa is ~21%.


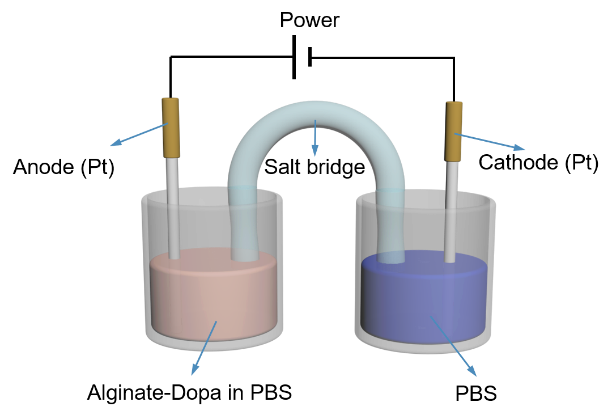


**Fig. S2** Electro-oxidization of the dopa contained ploymers using the galvanic cell. N-acetyldopamine (100 mM) or Alginate-Dopa (20 mg mL-1) dissolved in PBS (10mM, pH=7.4) was placed at the anode and a voltage of 5 V was applied to the system.


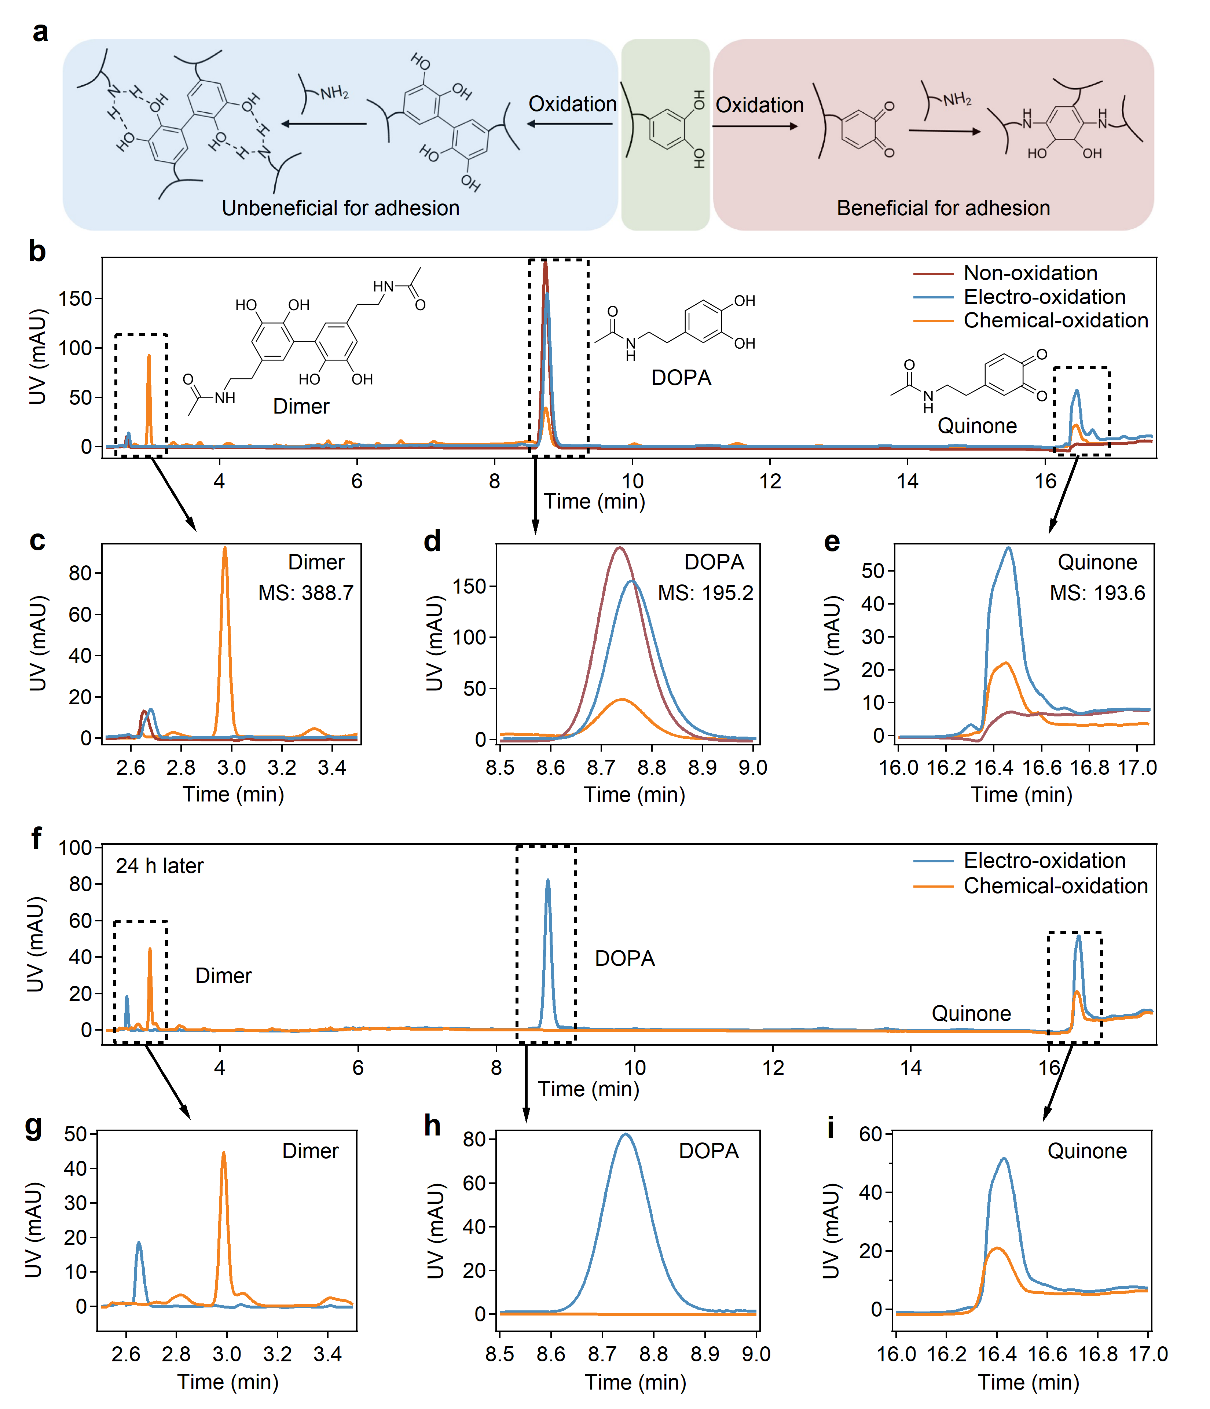


**Fig. S3** Schematic and characterization of the electro-oxidation of N-acetyldopamine. N-acetyldopamine was chosen as the model molecule and oxidized using different methods to confirm the products of electro- and chemical-oxidization. **a**, Different oxidation reaction pathway of dopa. The production of dimmer is useless for the surface adhension of Dopa contained materials. In contrast, the production of dopaquinone would extremely benefit the tissue adhension due to the covalent junction with amino. **b**,HPLC and mass analyses of N-acetyldopamine and the electro- or chemical-oxidation products of N-acetyldopamine. In the electro-oxidation, most of the phenolic hydroxyl groups changed into quinone while those in the chemical-oxidation formed dimmer. **c-e**, Zoomed HPLC curves of the dimer (**c**), Dopa (**d**) and quinone (**e**) in **b**. **f**, HPLC and mass analyses of the electro- or chemical-oxidation products of N-acetyldopamine after storage for 24 hours. The remianed Dopa in the products of chemical-oxidation changed into dimmer beacuse of the remanent oxidant while the electro-oxidized products slightly changed, indicating the stability and controllability of the electro-oxidation. **g-i**, Zoomed HPLC curves of the dimer (**g**), Dopa (**h**) and quinone (**i**) in **f**.


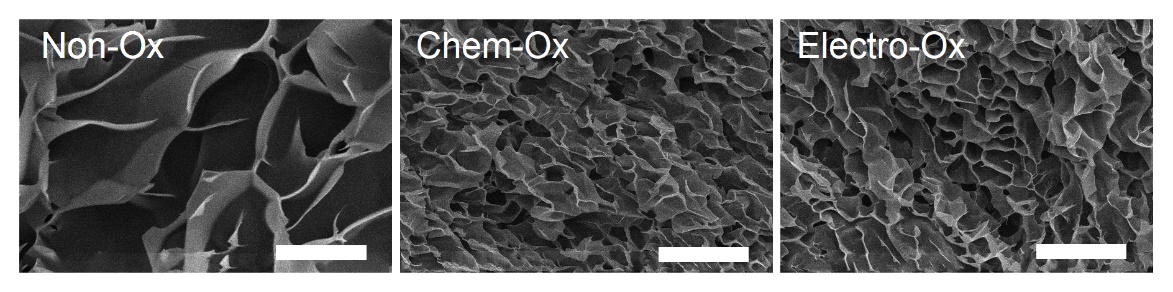


**Fig. S4** SEM images of the Non-Ox, Chem-Ox and Electro-Ox hydrogels. Scale bar = 100 μm.


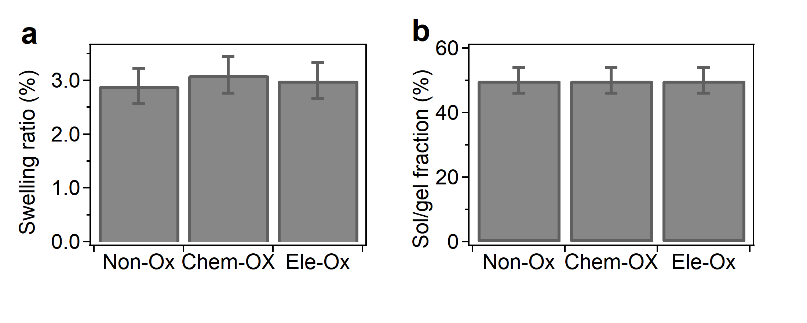


**Fig. S5** Swelling ratio (**a**) and so/gel fraction (**b**) of different hydrogel at the alginate-dopa of 10 w/v%. Values represent the mean and standard deviation (n=3-5).


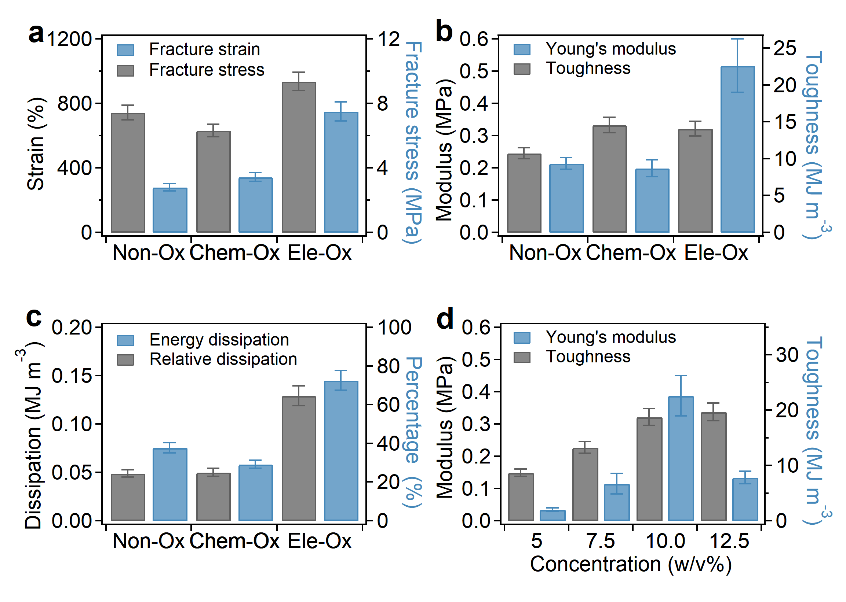


**Fig. S6** Mechanical characterization of Non-Ox, Chem-Ox and Electro-Ox hydrogels. **a**, Fracture strain and fracture stress. **b**, Young’s modulus and toughness. **c**, Energy dissipation and relative dissipation ratio. **d**, Young’s modulus and toughness of Electro-Ox hydrogel at various mass concentration of electro-oxidized alginate-dopa. Values represent the mean and standard deviation (n=4-6).


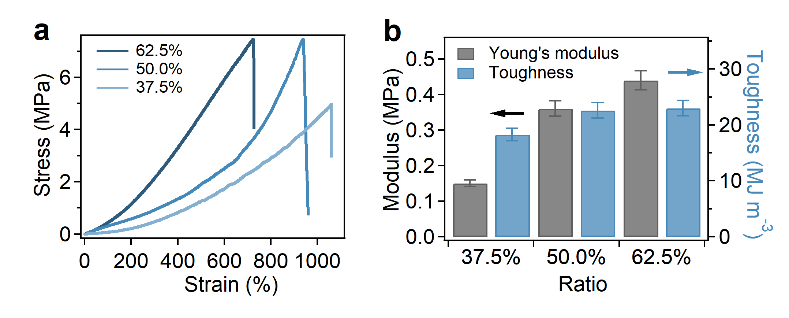


**Fig. S7** Mechanical properties of the Electro-Ox hydrogel tape at different total mass concentrations. **a**, Typical stress versus stretch curves of EO-Dopa hydrogel at various total mass concentration (37.5, 50.0 and 62.5 w/v%). **b**, Summarized Young’s modulus and toughness of the hydrogel tape corresponding to **a**. Values represent the mean and standard deviation (n=4-6).


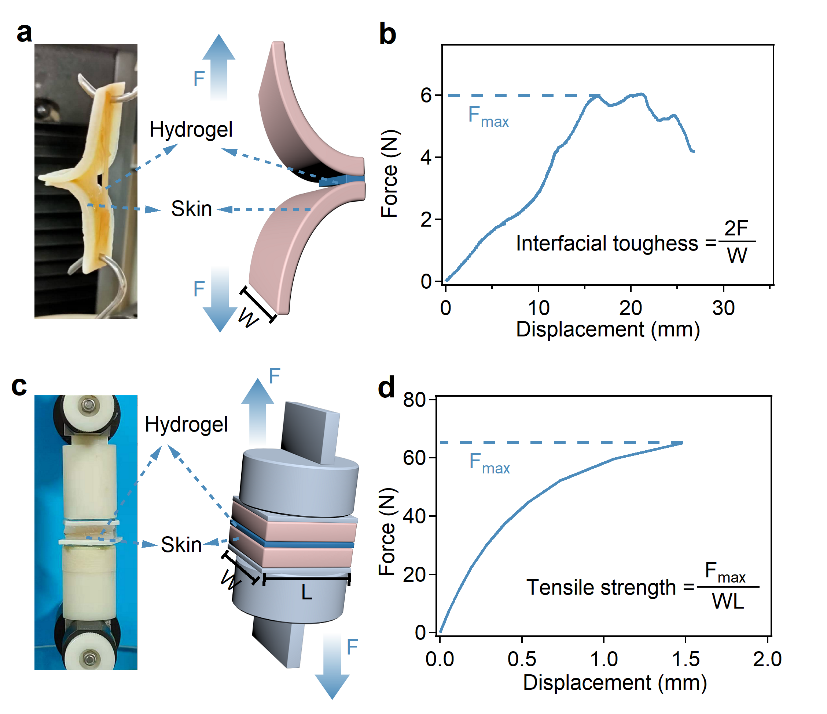


**Fig. S8** Setups for mechanical testing of adhesion performance. **a**, **b**, Schematic (**a**) and typical stress-strain curves (**b**) of the interfacial toughness test. **c**, **d**, Schematic (**c**) and typical stress-strain curves (**d**) of the tensile strength test.


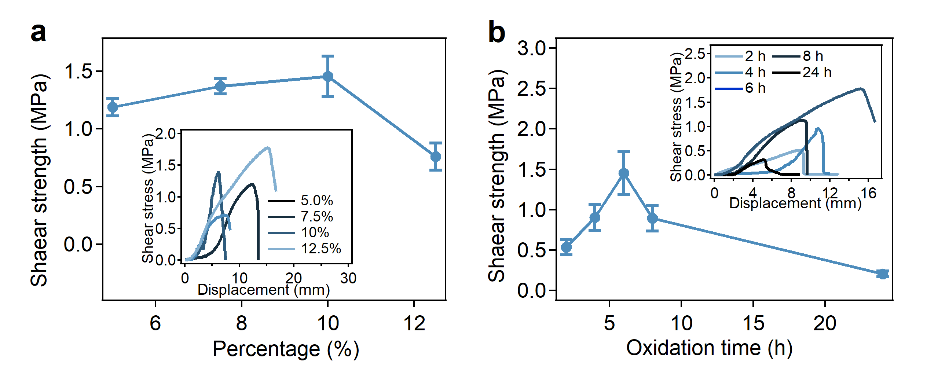


**Fig. S9** Optimization of adhesion strength by varying the concentration and the electro-oxidation time of alginate-Dopa. **a**, Shear strength of wet porcine skin adhered using the hydrogel tape containing various concentrations of electro-oxidized alginate-Dopa (5, 7.5, 10 and 12.5 w/v%). **b**, Shear strength of wet porcine skin adhered using the hydrogel tape containing alginate-Dopa electro-oxidized for different times (2, 4, 6, 8 and 24 h). Values represent the mean and standard deviation (n=4-6).


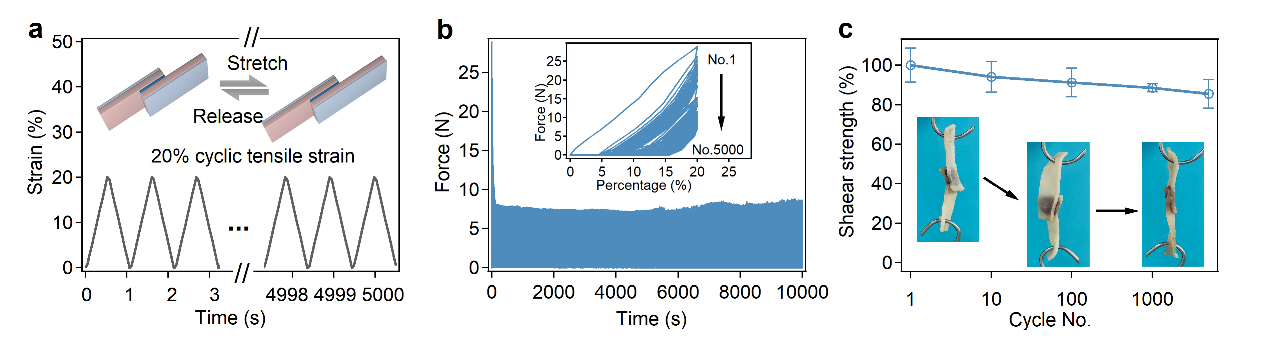


**Fig. S10** Stabilities of the long-term tissue adhesion of the Electro-Ox hydrogel tapes. **a**, Cyclic stretch-relaxation at the strain of 20% was applied to the porcine skin adhered by Electro-Ox hydrogel tape. Inset corresponds to the schematic of the stretch-relaxation cycles. **b**, Typical stretch-relaxation curves versus time of the adhered porcine skins in 5000 loading cycles. Inset corresponds to the stretch-relaxation curves versus strain. The force decreased gradually due to the plastic deformation of porcine skins. **c**,Shear strength of the adhered porcine skin as a function of the cyclic number of 20% tensile strain applied to the porcine skin. Values represent the mean and standard deviation (n=3-5).


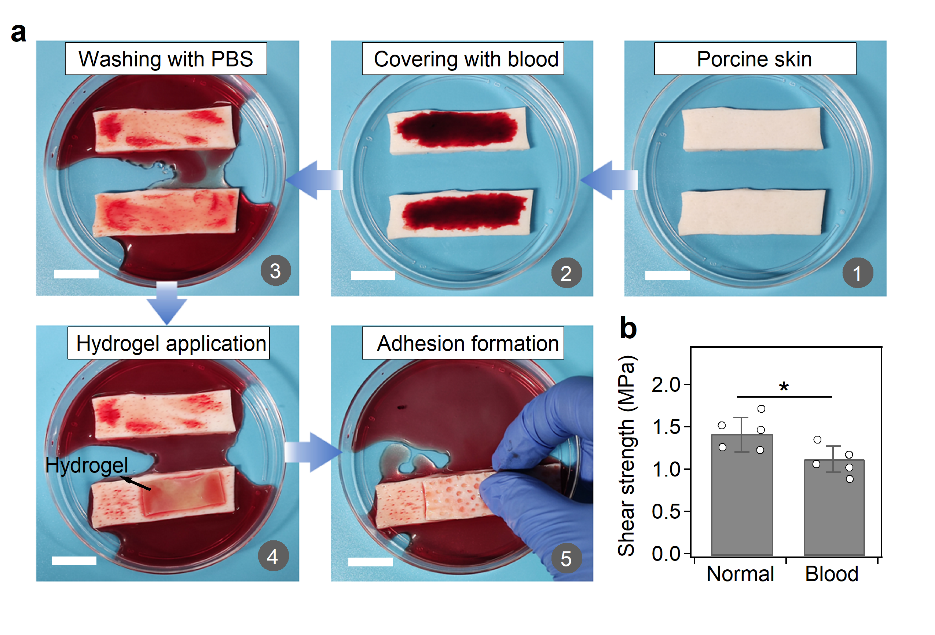


**Fig. S11** Adhesion performance of Electro-Ox hydrogel tapes on blood covered porcine skins. **a**, Adhesion of porcine skin covered with blood using Electro-Ox hydrogel tape. Scale bar = 20 mm. **b**, Long-term adhesion strength between porcine skins without and with blood. Values represent the mean and standard deviation (n = 5). *: p<0.05


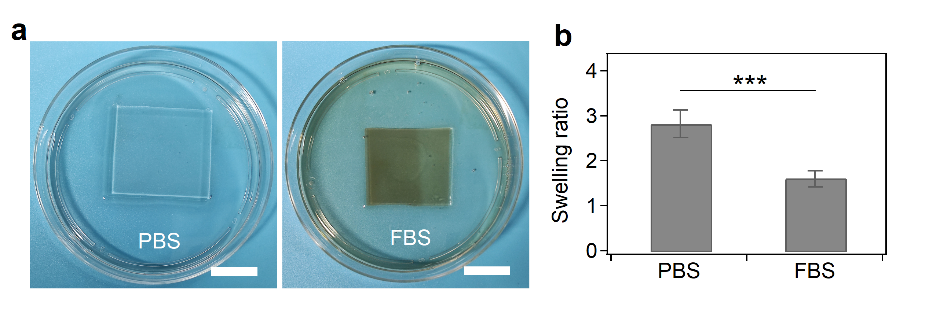


**Fig. S12** Swelling of Electro-Ox hydrogels in PBS and foetal bovine serum (FBS). **a**, Images of Electro-Ox hydrogels with the same initial size after swelling in PBS and FBS for 48 hours. Scale bar = 20 mm. **b**, Swelling ratios of Electro-Ox hydrogels in PBS and FBS. Values represent the mean and standard deviation (n = 5). ***: p<0.001


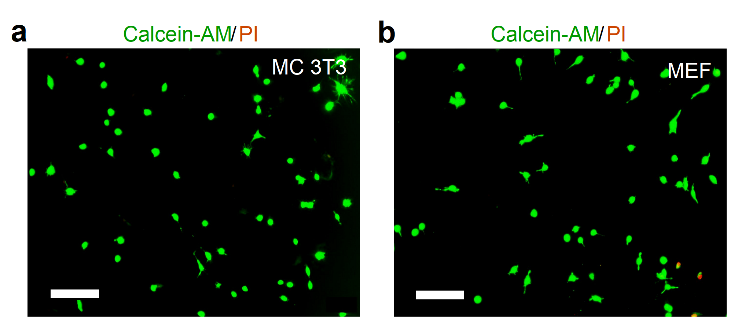


**Fig. S13** Fluorescence microscope images of MC 3T3 (**a**) and MEF (**b**) cells cultured in the control medium. The living and dead cells were stained with live/dead assay (Calcein-AM/PI Double Staining Kit) after 24 h of culture.


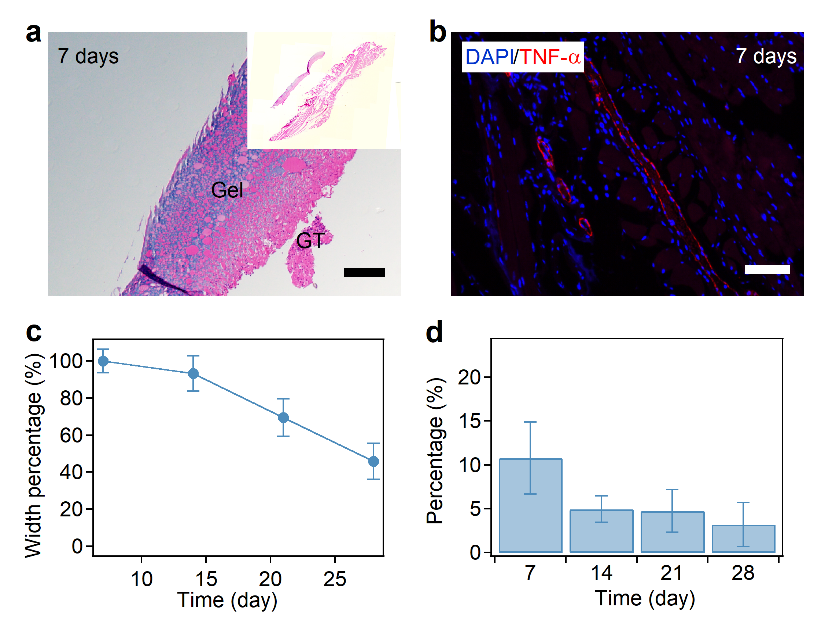


**Fig. S14** Analysis of the in vivo biodegradation and inflammatory responses of the Electro-Ox hydrogel tapes. **a**, Representative histological images stained with H&E for assessment of the biodegradation of the Electro-Ox hydrogel tape in vivo after the subcutaneous implantation for 7 days. All experiments were repeated at least three times with similar results. Scale bar = 400 μm. **b**, Representative images identified by molecular markers (TNF-α) immunostaining for assessment of the inflammatory responses of the Electro-Ox hydrogel tape in vivo after the subcutaneous implantation for 7 days. The TNF-α (Red) as specific markers for inflammation was not obvious in all the images. Cell nucleus are indicated by DAPI (Blue). Scale bar=100 μm. All experiments were repeated at least three times with similar results. **c**, Normalized thickness of Electro-Ox hydrogel tape after the subcutaneous implantation for different times (7, 14, 21 and 28 days). **d**, Area ratios of TNF-α and DAPI in the images identified by molecular markers immunostaining after the subcutaneous implantation in vivo for different times (7, 14, 21 and 28 days). Values in panels **c**, **d** represent the mean and the standard deviation (n = 5).

**Movie S1.**

Sealing of a water-leaking stomach in vitro.

**Movie S2.**

Sealing of a air-leaking lung in vitro.

**Movie S3.**

Sensor adhesion application in vitro.

**Movie S4.**

Gastrocnemius adhesion in vivo.

**Movie S5.**

Device adhesion on beating heart in vivo.

**Movie S6.**

Vessel rupture hemostasis in vivo.
